# Supplementary material for: Towards a durable high performance anode material for lithium storage: stabilizing N-doped carbon encapsulated FeS nanosheets with amorphous TiO2
Source: Royal Society of Chemistry journal article supplement (doi:10.1039/c9ta03196k), 2019-01-01
Supplement: c9ta03196k1.pdf [file c9ta03196k1.pdf]

## Supporting Information

Towards durable high performance anode material for lithium storage: stabilizing  
N-doped carbon encapsulated FeS nanosheets with amorphous TiO<sub>2</sub>

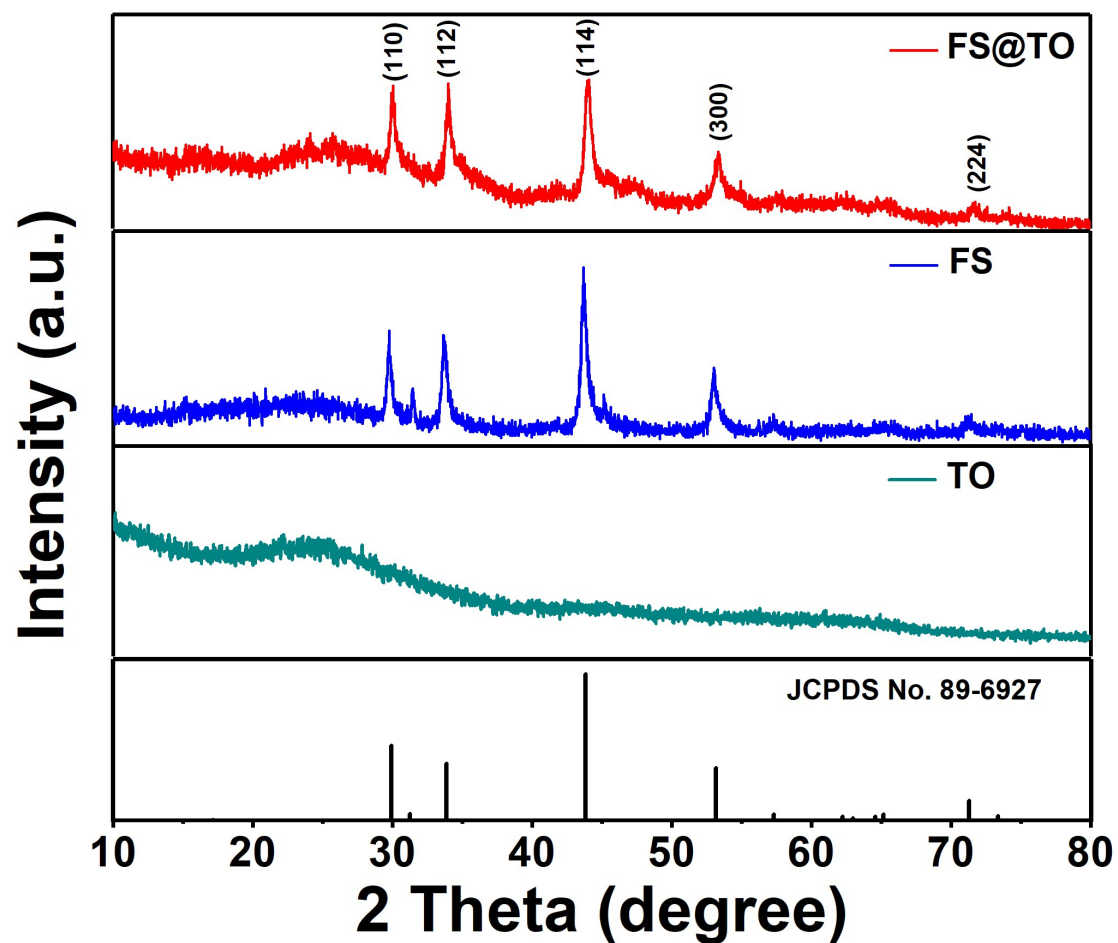

**Fig. S1.** X-ray diffraction patterns of FS@TO, FS and TO obtained by annealing the precursor at 500°C for 3h.

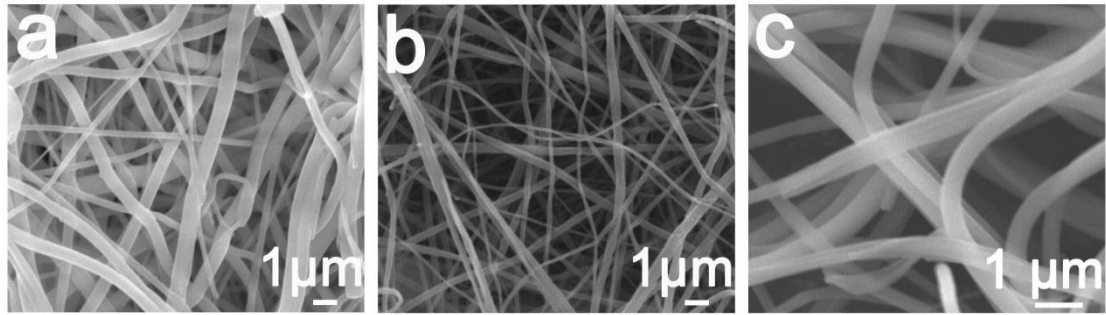

**Fig. S2.** (a) SEM images of the precursor of FS@TO nanofibers, (b) the precursor of FS nanofibers

(c) the precursor of TO nanofibers.

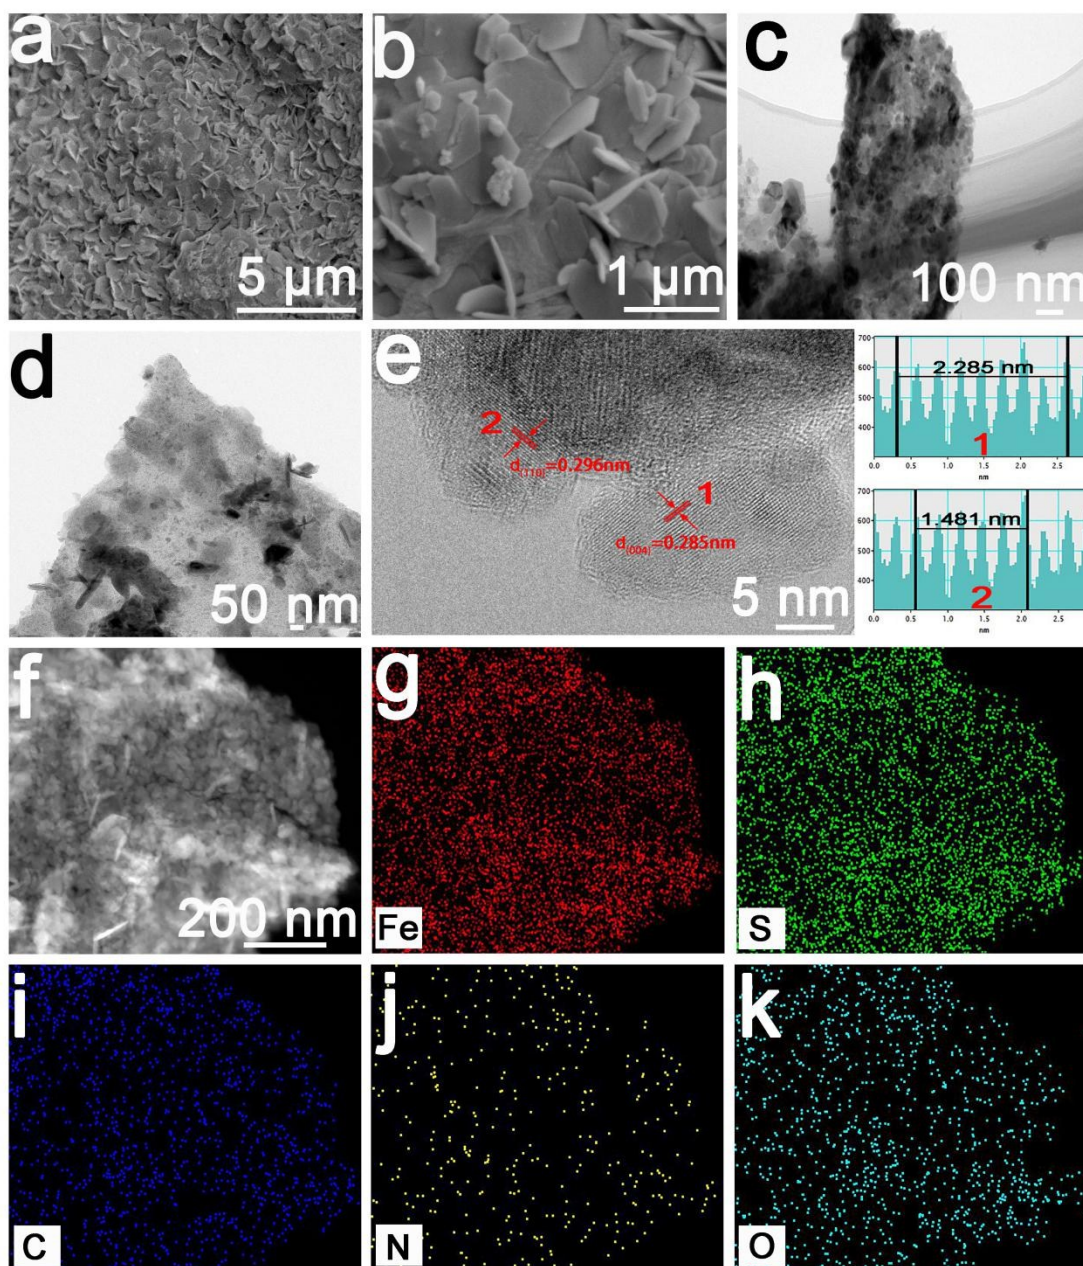

**Fig. S3.** (a, b) SEM images, (c, d) TEM images, (e) the high-magnification TEM images, (f-k) element mapping images (Fe, S, C, N, O) of FS nanosheets.

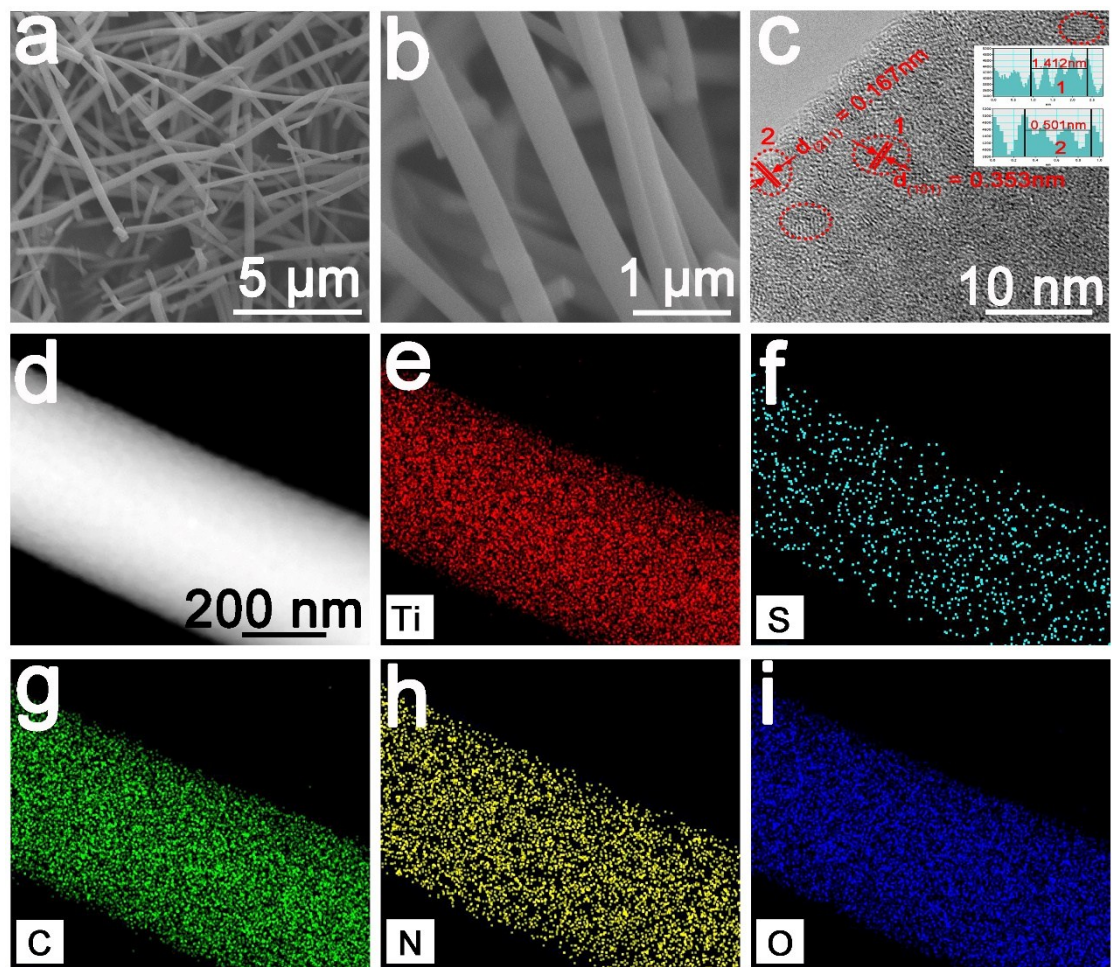

**Fig. S4.** (a, b) SEM images, (c) the high-magnification TEM images, (d-i) element mapping images (Ti, S, C, N, O) of TO nanofibers.

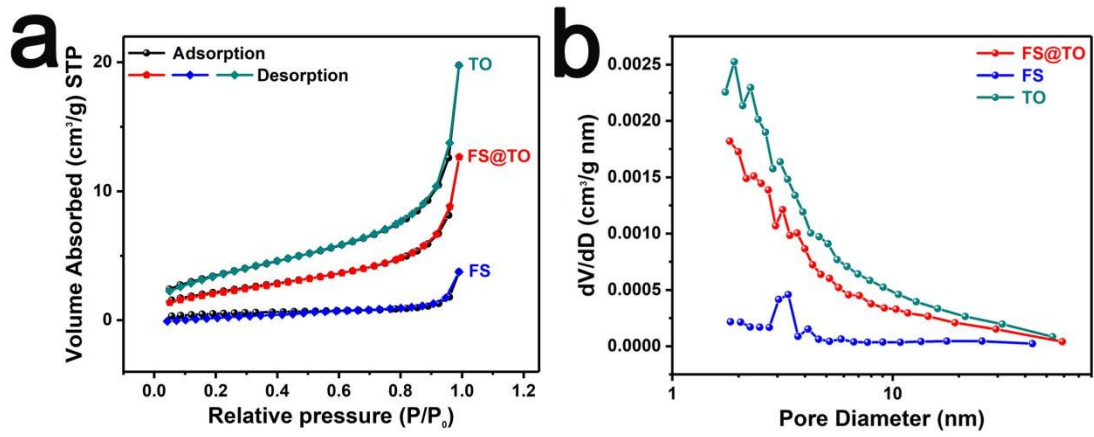

**Fig. S5.** (a) Nitrogen adsorption-desorption isotherms, (b) corresponding pore size distribution curves of FS@TO, FS and TO.

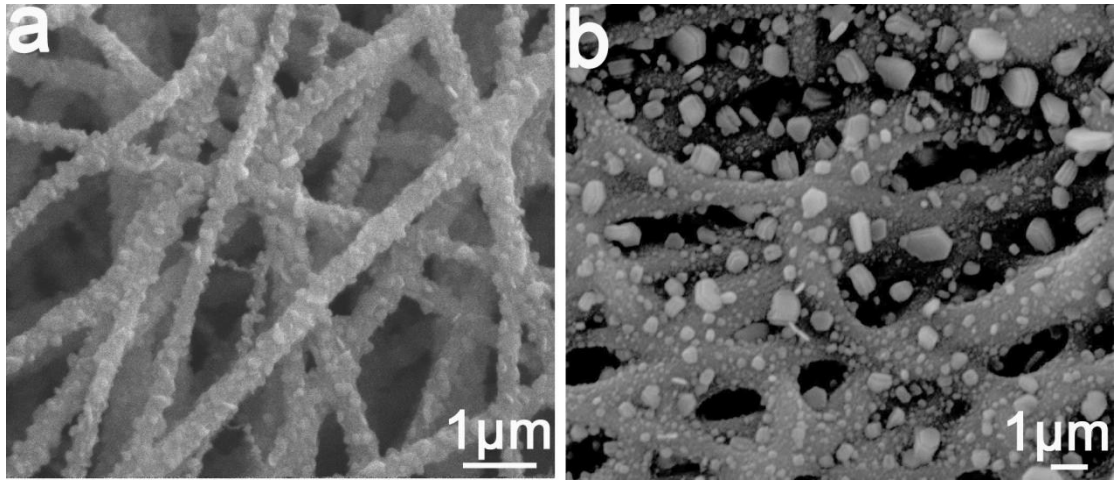

**Fig. S6.** (a) SEM images of FS@TO composite nanofibers at 600 °C, (b) SEM images of FS@TO composite nanofibers at 700 °C.

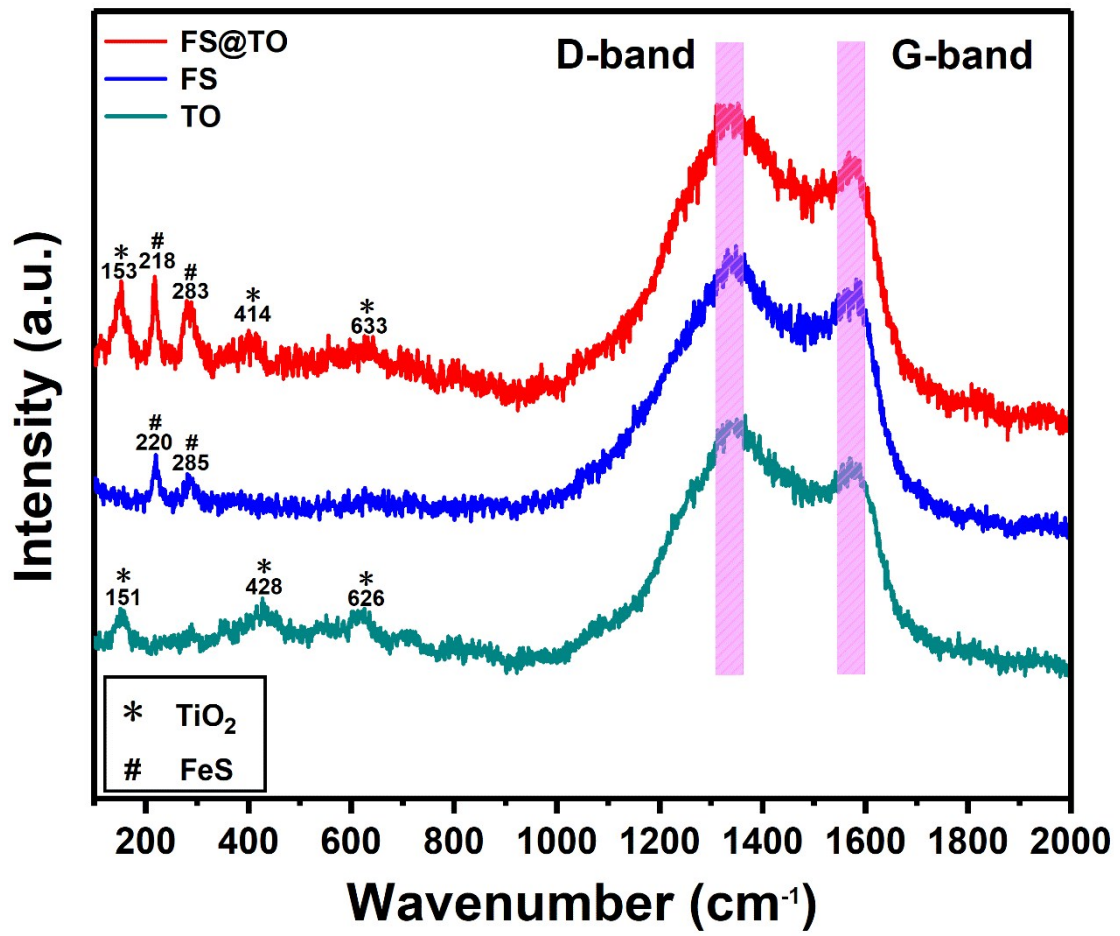

Fig. S7. Raman spectra of sample FS@TO, FS and TO.

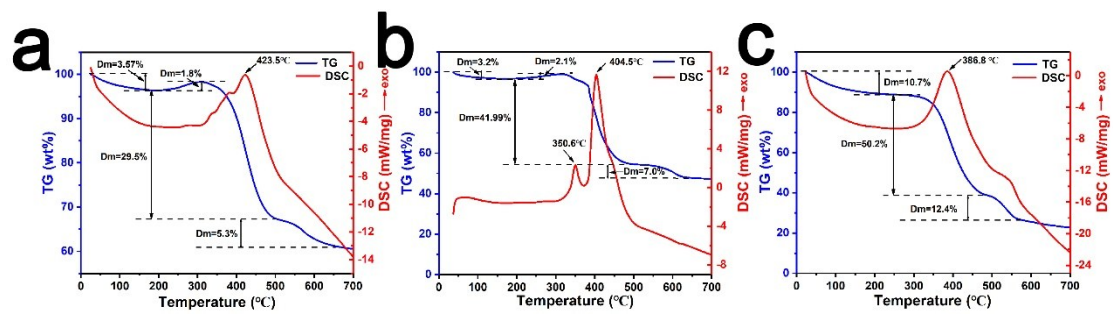

**Fig. S8.** TG-DSC curve of FS@TO (a), FS (b) and TO (c) heated in air from room temperature to 700 °C.



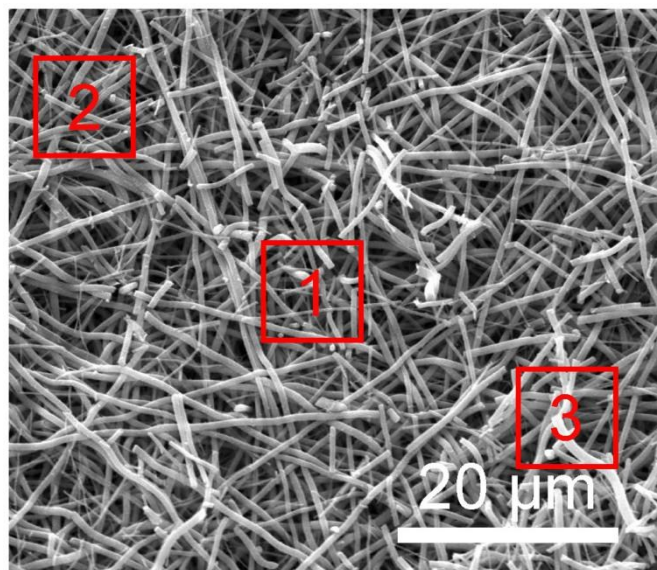

**Fig. S9.** SEM image and the spots for EDS characterization of FS@TO sample.

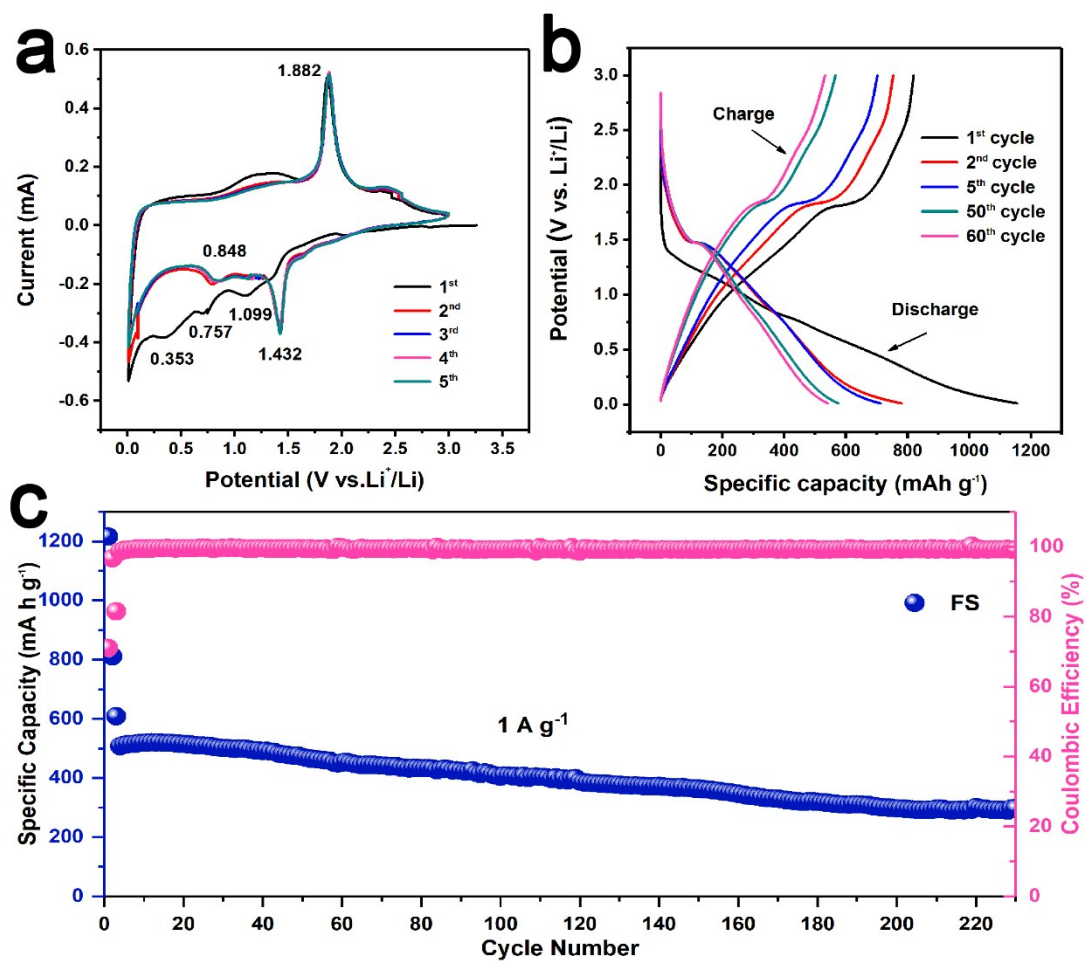

**Fig. S10.** Electrochemical performance for LIBs: (a) CV curves at  $0.1 \text{ mV s}^{-1}$  in the voltage range of 0.01-3.0 V versus  $\text{Li}^+/\text{Li}$  (b) the initial, second, fifth, fiftieth and sixtieth discharge/charge profiles of the FS at  $0.1 \text{ A g}^{-1}$  (c) long cycle performances of the FS at  $1.0 \text{ A g}^{-1}$ .

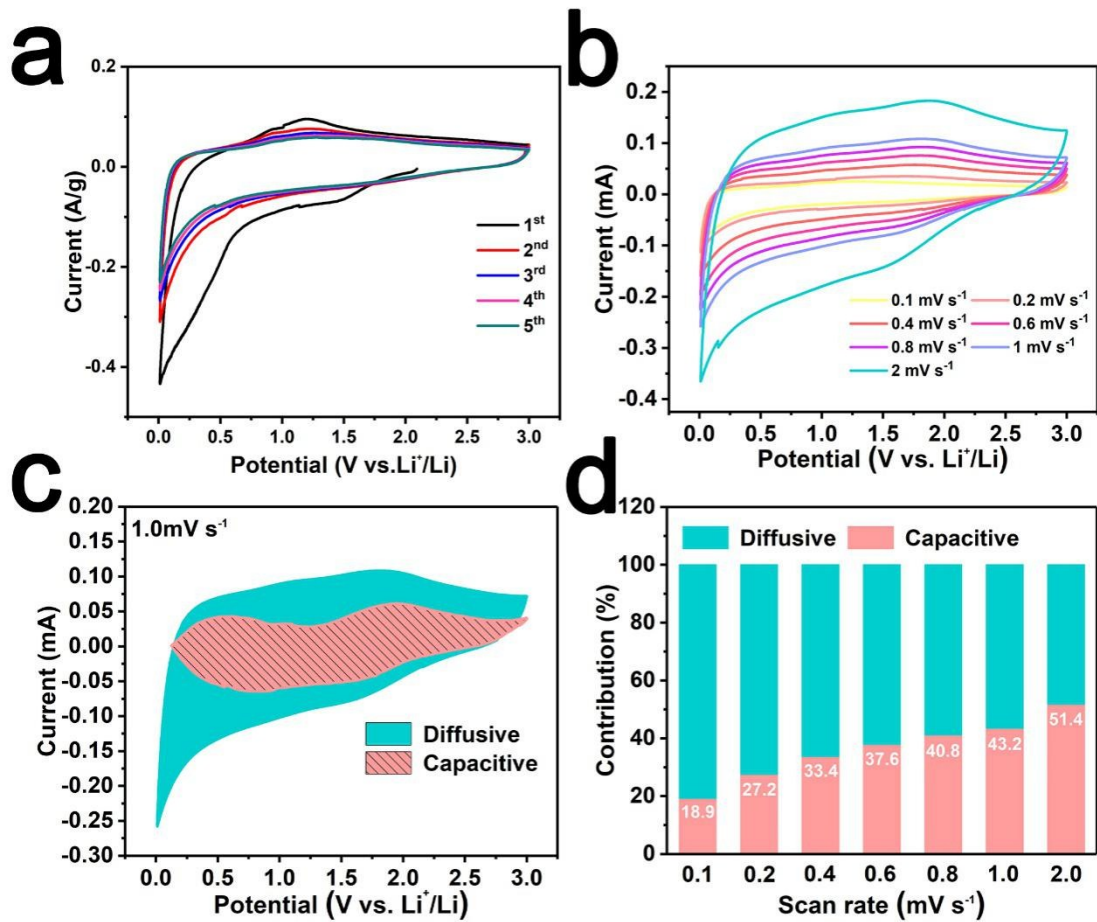

**Fig. S11.** CV curves of TO sample scanned at 0.1 mV s<sup>-1</sup> (a) and at different scan rates from 0.1 to 2.0 mV s<sup>-1</sup> (b), diffusive contribution (mint green) and capacitive contribution (pink) (c) at 1.0 mV s<sup>-1</sup>, the percentage of pseudocapacitive contribution (d) at different scan rates.

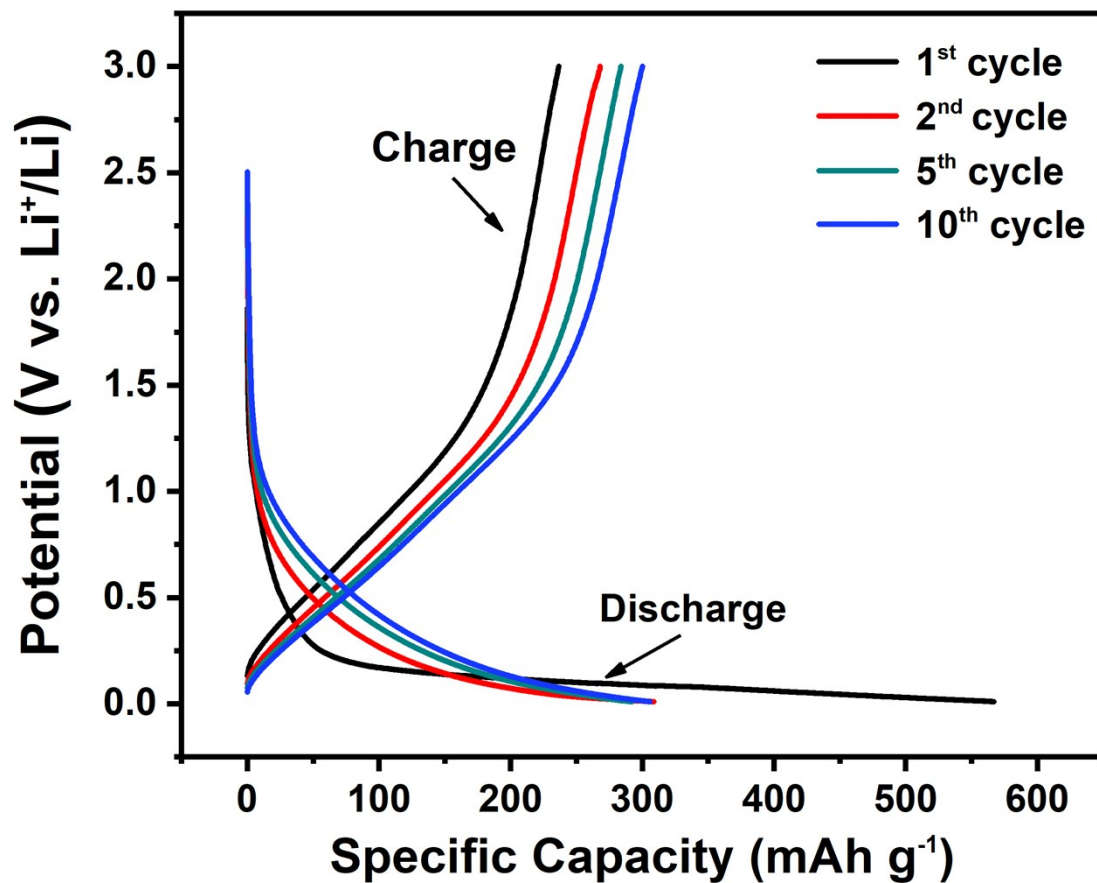

Fig. S12. The initial, second, fifth and tenth discharge/charge profiles of the PVP at 0.1 A g<sup>-1</sup>.

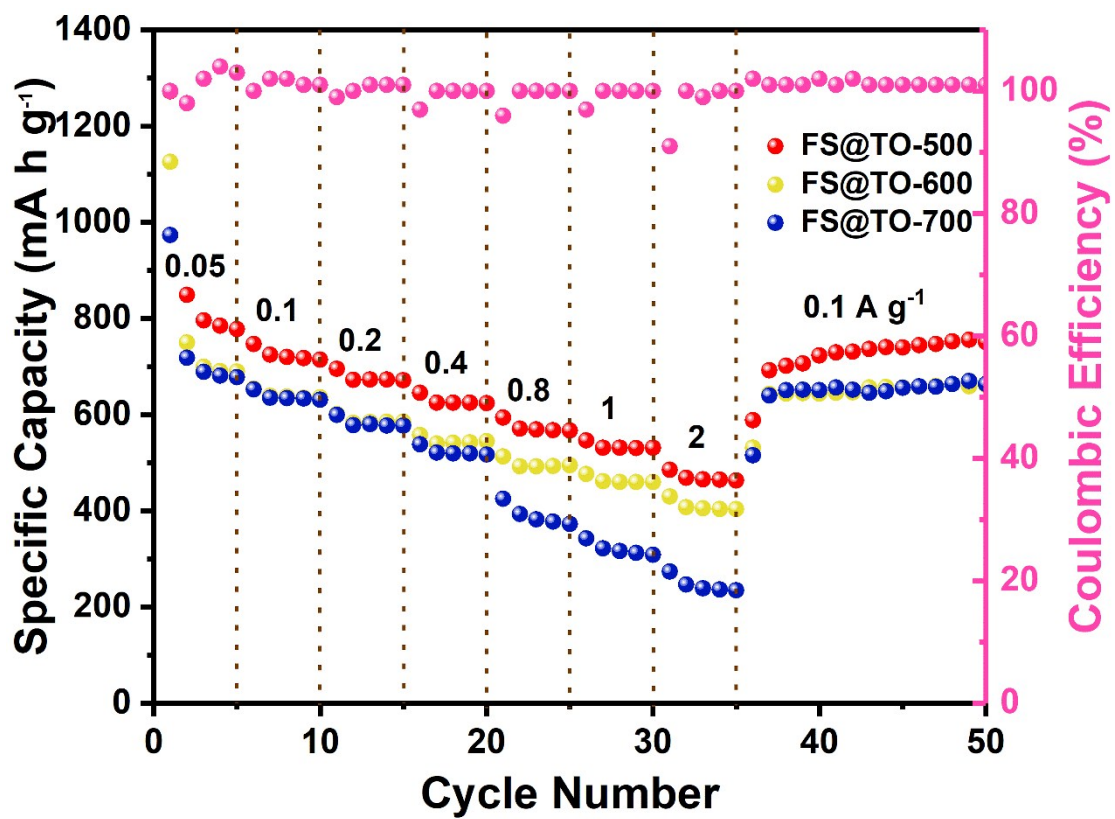

Fig. S13. Rate properties of the FS@TO-500, FS@TO-600, FS@TO-700 at different current densities.

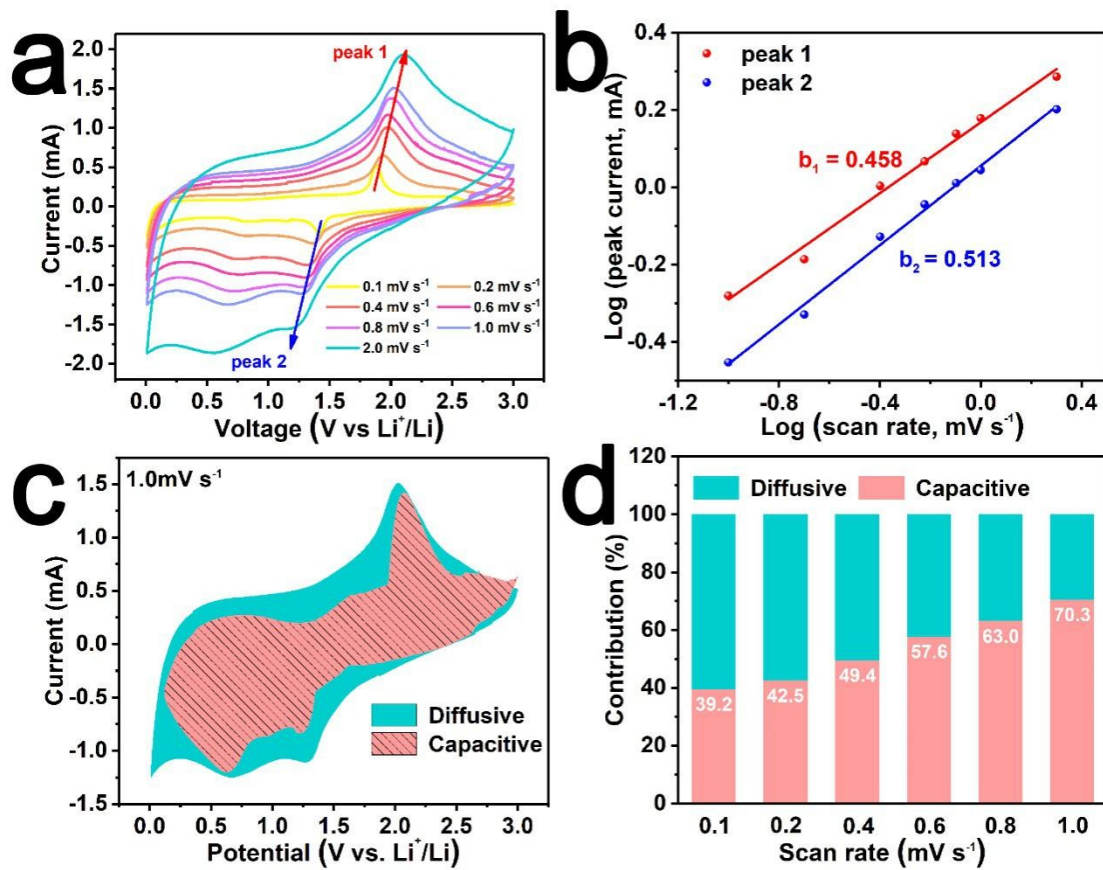

**Fig. S14.** (a) CV curves at different scan rates from 0.1 to 2.0 mV s<sup>-1</sup> of the FS; (b) Corresponding log(*I*) versus log(*v*) plots at specific peak currents; (c) Diffusion contribution (mint green) and Capacitive contribution (pink) at 1.0 mV s<sup>-1</sup>. (d) the percent of pseudocapacitive (diffusion contribution and capacitive contribution) at different scan rates.

The calculation formula for diffusion coefficient based on EIS test is shown as follows [11]:

$$D = \frac{R^2 T^2}{2A^2 n^4 F^4 C^2 \sigma^2} \quad \text{Equation S1}$$

Where *A* represents the surface area of electrode, *n* means the number of electrons per molecule attending the charge-discharge reaction, *F* is the Farady constant, *C* is the concentration of lithium ion in our composite electrode, and  $\sigma$  is the slope of the fitted line  $Z' - \omega^{-1/2}$ , *R* represents the gas constant, *T* is the test temperature.

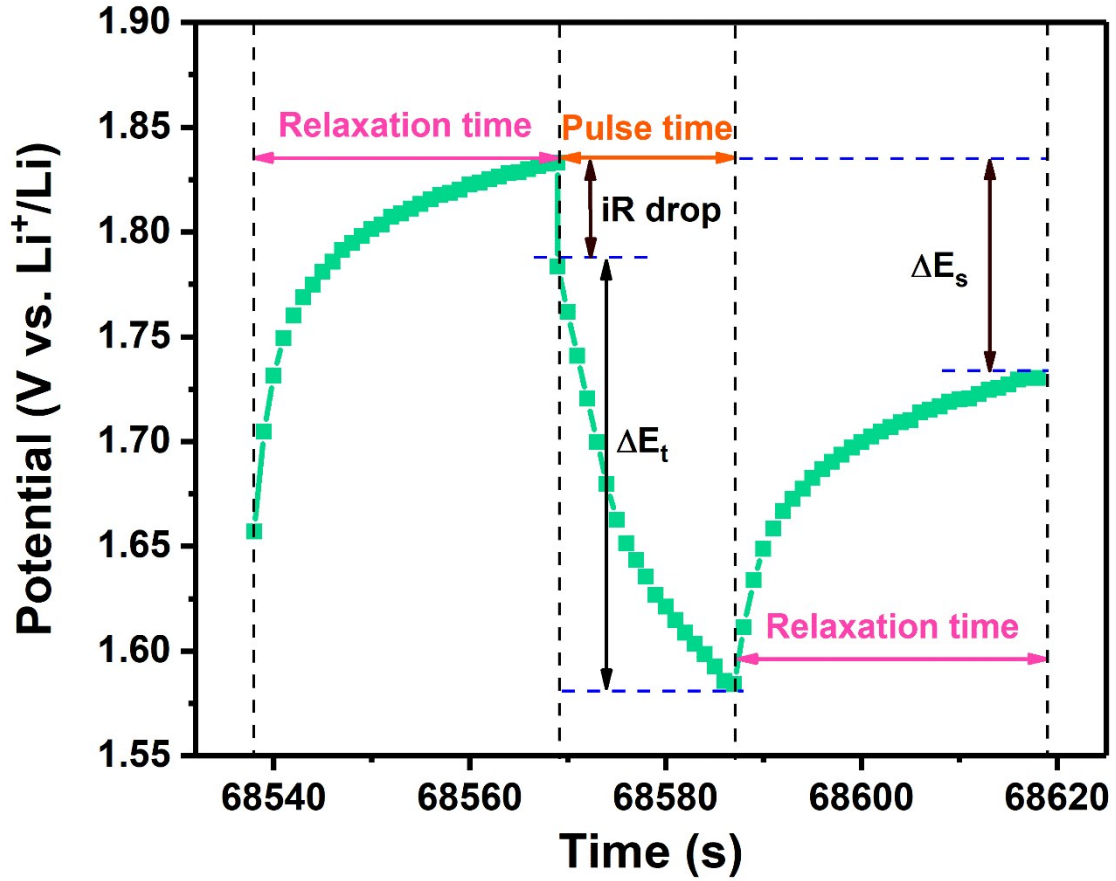

Fig. S15. E vs. t curves of FS@TO electrode for a single GITT during discharge process.

The lithium diffusion coefficient was measured by using Galvanostatic intermittent titration technique (GITT) and calculated based on equation S2 as follows[12].

$$D = \frac{4L^2}{\pi\tau} \left( \frac{\Delta E_s}{\Delta E_t} \right)^2 \quad \text{Equation S2}$$

Where L is lithium ion diffusion length (unit : cm); for compact electrode, it is equal to average thickness of pole piece measured,  $\tau$  is the relaxation time (unit : s), and  $\Delta E_s$  is the steady-state potential (unit : V) by the current pluse.  $\Delta E_t$  is the potential change (unit : V) during the constant current pluse after eliminating the iR drop (Fig. S12),  $\tau$  is the duration of the current pluse (unit : s).

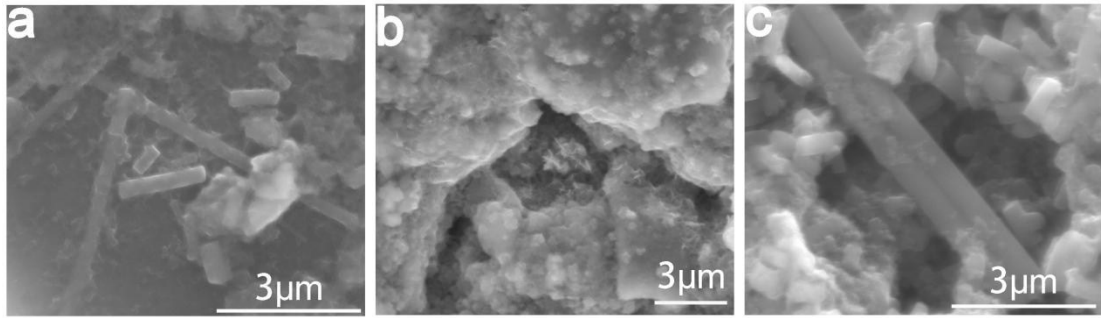

**Fig. S16.** SEM images of (a) FS@TO (b) FS (c) TO after 50 cycles at 0.5 A g<sup>-1</sup>.



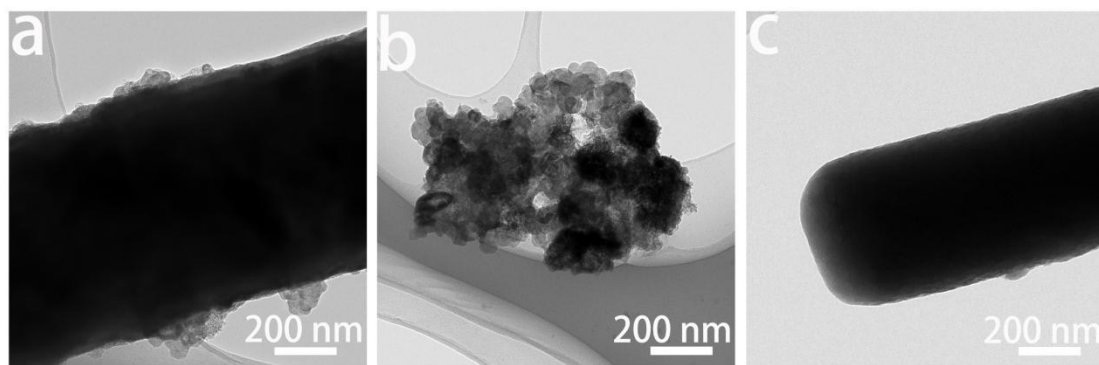

**Fig. S17.** TEM images of (a) FS@TO, (b) FS and (c) TO after 50 cycles at  $0.5 \text{ A g}^{-1}$ .

**Table S1.** Surface area and pore volume analysis results of FS@TO, FS, TO.

| <b>Samples</b> | <b>S<sub>BET</sub> (m<sup>2</sup>/g)</b> | <b>S<sub>Langmuir</sub> (m<sup>2</sup>/g)</b> | <b>V<sub>pore</sub> (cm<sup>3</sup>/g)</b> | <b>D<sub>pore</sub> (nm)</b> |
|----------------|------------------------------------------|-----------------------------------------------|--------------------------------------------|------------------------------|
| <b>FS@TO</b>   | 8.1                                      | 49.3                                          | 0.019                                      | 5.8                          |
| <b>FS</b>      | 2.0                                      | 7.9                                           | 0.006                                      | 4.5                          |
| <b>TO</b>      | 12.8                                     | 75.4                                          | 0.030                                      | 5.6                          |

**Table S2.** C-S analysis result of FS@TO synthesized at 500°C.

| Samples | C      | S      |
|---------|--------|--------|
| FS@TO   | 23.52% | 19.44% |

**Table S3.** EDS analysis result of FS@TO sample.

|               | <b>Element</b>       | <b>Fe</b> | <b>Ti</b> | <b>S</b> | <b>C</b> | <b>N</b> | <b>O</b> |
|---------------|----------------------|-----------|-----------|----------|----------|----------|----------|
| <b>Spot 1</b> | <b>Content (wt%)</b> | 22.62     | 24.98     | 10.54    | 27.32    | 3.92     | 10.63    |
|               | <b>Content (at%)</b> | 9.05      | 11.66     | 7.35     | 50.84    | 6.26     | 14.85    |
| <b>Spot 2</b> | <b>Content (wt%)</b> | 22.64     | 24.67     | 10.4     | 27.22    | 4.22     | 10.84    |
|               | <b>Content (at%)</b> | 9.03      | 11.47     | 7.23     | 50.48    | 6.71     | 15.09    |
| <b>Spot 3</b> | <b>Content (wt%)</b> | 21.28     | 19.92     | 9.06     | 32.3     | 4.96     | 12.48    |
|               | <b>Content (at%)</b> | 7.77      | 8.48      | 5.76     | 54.84    | 7.23     | 15.91    |

**Table S4.** ICP-OES analysis results of FS@TO nanofibers.

| Sample | Element | Content (wt%) | Molar ratio (Fe: Ti) |
|--------|---------|---------------|----------------------|
| FS@TO  | Fe      | 16.4%         | 1 : 1.082            |
|        | Ti      | 15.22%        |                      |

According to the TGA results of FS@TO, the mass percentage of the carbonaceous network in FS@TO is about 32.5%. To further confirm the mass percentage of N-doped carbonaceous network, EDS was also employed and results are shown in **Fig. S9** and **Table S3**. The average mass percentage of C and N is about 33.3%, which is consistent with the result obtained from TGA result. **Table S4** shows the test results of ICP-OES, the atom ratio between Ti and Fe is 1.082:1. So the mass ratio between amorphous TiO<sub>2</sub> and FeS is calculated to be 0.983:1. The calculation is based on the equation below:

$$\frac{m_{TiO_2}}{m_{FeS}} = 1.082 * M_{TiO_2} / M_{FeS}$$

where  $m_{TiO_2}$  refers to the mass of TiO<sub>2</sub>,  $m_{FeS}$  refers to the mass of FeS,  $M_{TiO_2}$  refers to the molar mass of TiO<sub>2</sub> and  $M_{FeS}$  refers to the molar mass of FeS. Thus, the mass percentages of N-doped carbon, amorphous TiO<sub>2</sub> and FeS are around 33.3%, 33.1%, 33.6%, respectively.

**Table S5.** Comparison of electrochemical performances of FeS-based electrode for lithium-ion batteries.

| Electrode description                 | Voltage window (V) | Rate Capability                       |                                                  | Cycling stability    |                    |                         |
|---------------------------------------|--------------------|---------------------------------------|--------------------------------------------------|----------------------|--------------------|-------------------------|
|                                       |                    | Current density                       | Specific capacity                                | Current density      | Cycling numbers    | Specific capacity       |
|                                       |                    | (A g <sup>-1</sup> )                  | (mA h g <sup>-1</sup> )                          | (A g <sup>-1</sup> ) | (cycles)           | (mA h g <sup>-1</sup> ) |
| FeS@TiO <sub>2</sub> [1]              | 0.01-3.0           | 0.1/0.5/1                             | 705/474/382                                      | 0.2/0.4              | 100/500            | 510/430                 |
| C@FeS nanosheets [2]                  | 0.01-3.0           | 0.1/0.5/1/3/6                         | 630/486/425/349/266                              | 0.1                  | 100                | 615                     |
| FeS@rGO [3]                           | 0.01-3.0           | 0.2/0.5/0.8/1/2/3/5                   | 580/479/433/415/370/339/302                      | 1/5                  | 200/1000           | 662/325                 |
| FeS@C carbon cloth [4]                | 1.0-2.6            | 0.15C/0.3C/0.75C/1.5C/7.5C (1C=0.609) | 560/530/500/460/370                              | 0.15C/1.2C           | 100/200            | ~420/~300               |
| FeS@RGO [5]                           | 0.005-3.0          | 0.2/0.3/0.5/1                         | 660/530/400/200                                  | 0.1/0.3              | 40/30              | 978/618                 |
| FeS microsheet networks [6]           | 0.01-3.0           | 0.1/0.2/0.5/1/2                       | 797/770/505/357/150                              | 0.1                  | 20                 | 697                     |
| C/FeS [7]                             | 0.005-3.0          | 0.5/1/2                               | 485.1/339.4/243.1                                | 2                    | 300                | 300                     |
| G@FeS-GNRs [8]                        | 0.01-3.0           | 0.1/0.2/0.4/0.8/1                     | 693/600/550/520/498                              | 0.4                  | 100                | 536                     |
| FeS/Ag [9]                            | 0.8-2.5            | 0.1C/0.5C/1C/2C (1C=0.609)            | 525/450/200/150                                  |                      |                    |                         |
| FeS nanodots in carbon nanowires [10] | 1.0-3.0            | 0.1C/0.5C/1C/2C/5C/10C (1C=609)       | 579/506/458/422/373/322                          | 0.5C                 | 50                 | 400                     |
| <b>This work</b>                      | <b>0.01-3.0</b>    | <b>0.1/0.2/0.4/0.8/1.6/3.2/5</b>      | <b>804.0/767.8/712.2/654.1/579.4/471.2/359.8</b> | <b>0.1/0.5/1</b>     | <b>100/228/500</b> | <b>591/554.6/402.5</b>  |

## References

- [1] X. Wang, Q. Xiang, B. Liu, L. Wang, T. Luo, D. Chen, G. Shen, *Sci Rep*, 3 (2013) 2007.
- [2] C. Xu, Y. Zeng, X. Rui, N. Xiao, J. Zhu, W. Zhang, J. Chen, W. Liu, H. Tan, H.H. Hng, Q. Yan, *ACS Nano*, 6 (2012) 4713-4721.
- [3] M. Huang, A. Xu, H. Duan, S. Wu, *Journal of Materials Chemistry A*, 6 (2018) 7155-7161.
- [4] X. Wei, W. Li, J.A. Shi, L. Gu, Y. Yu, *ACS Appl Mater Interfaces*, 7 (2015) 27804-27809.
- [5] L. Fei, Q. Lin, B. Yuan, G. Chen, P. Xie, Y. Li, Y. Xu, S. Deng, S. Smirnov, H. Luo, *ACS Appl Mater Interfaces*, 5 (2013) 5330-5335.
- [6] C. Xing, D. Zhang, K. Cao, S. Zhao, X. Wang, H. Qin, J. Liu, Y. Jiang, L. Meng, *Journal of Materials Chemistry A*, 3 (2015) 8742-8749.
- [7] J. Zhao, J.A. Syed, X. Wen, H. Lu, X. Meng, *Journal of Alloys and Compounds*, 777 (2019) 974-981.
- [8] L. Li, C. Gao, A. Kovalchuk, Z. Peng, G. Ruan, Y. Yang, H. Fei, Q. Zhong, Y. Li, J.M. Tour, *Nano Research*, 9 (2016) 2904-2911.
- [9] C. Dong, X. Zheng, B. Huang, M. Lu, *Applied Surface Science*, 265 (2013) 114-119.
- [10] C. Zhu, Y. Wen, P.A. van Aken, J. Maier, Y. Yu, *Advanced Functional Materials*, 25 (2015) 2335-2342.
- [11] J.S. Cho, Y.J. Hong, Y.C. Kang, *ACS nano*, 9 (2015) 4026-4035.

[12] B. Yin, X. Cao, A. Pan, Z. Luo, S. Dinesh, J. Lin, Y. Tang, S. Liang, G. Cao,  
Advanced Science, 5 (2018) 1800829.
